# Supplementary material for: FGFR inhibition augments anti–PD-1 efficacy in murine FGFR3-mutant bladder cancer by abrogating immunosuppression
Source: PubMed Central journal article supplement (PMC10786699; doi:10.1172/jci169241), 2024-01-16

# Supplementary Figure 1

A

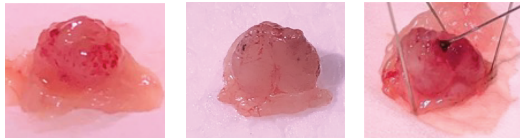

UPFL2

UPFL6

UPFL7

## Representative images of UPFL tumors.

(A) Gross images of UPFL tumor bearing bladders.

(B-E) Photomicrographs of four (4) representative H&E stained UPFL bladder tumors. Each tumor is shown at low magnification with an inset box indicating the area of the related high magnification image.

B

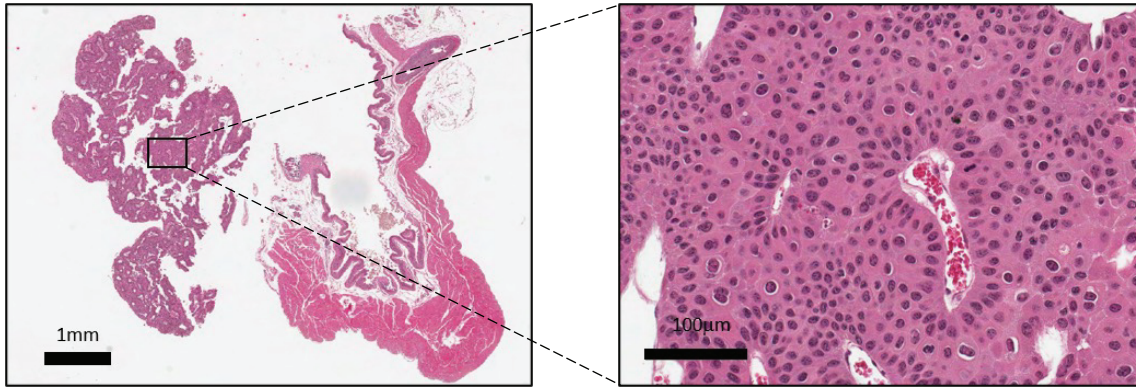

C

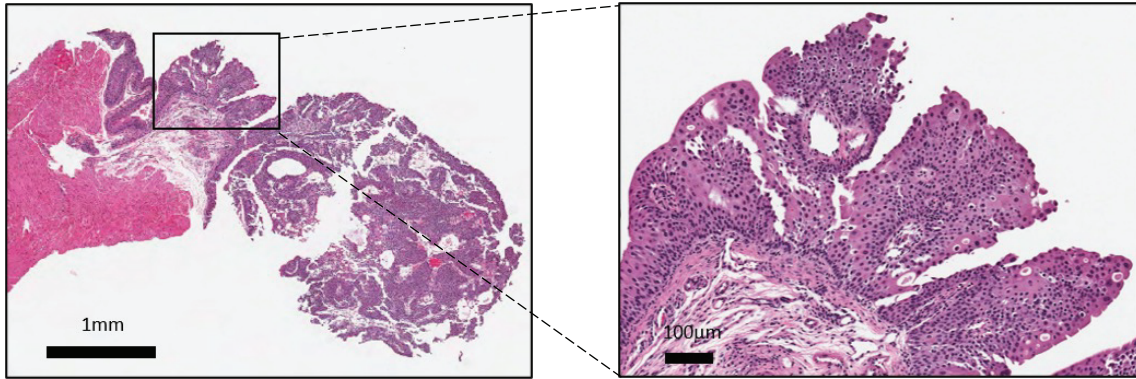

D

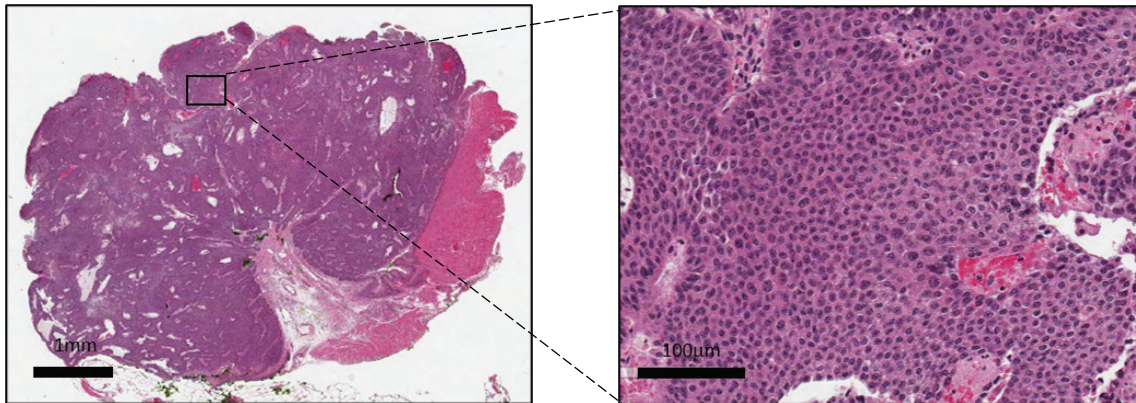

E

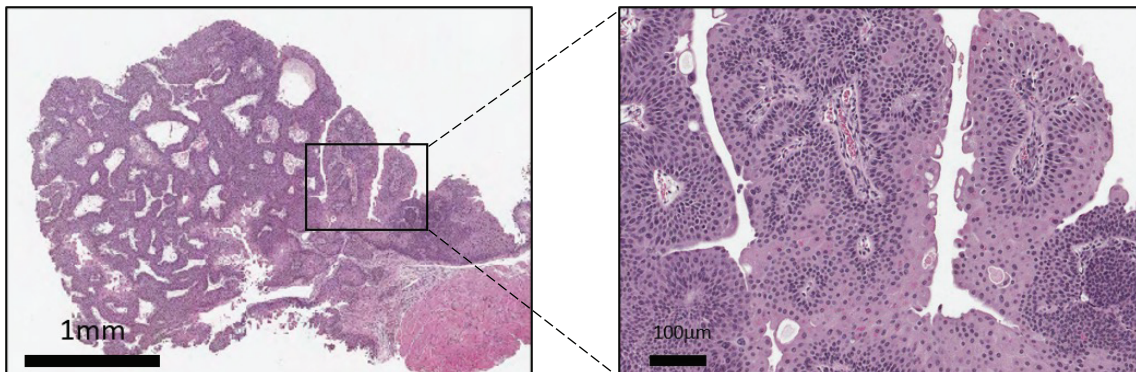

## Supplementary Figure 2

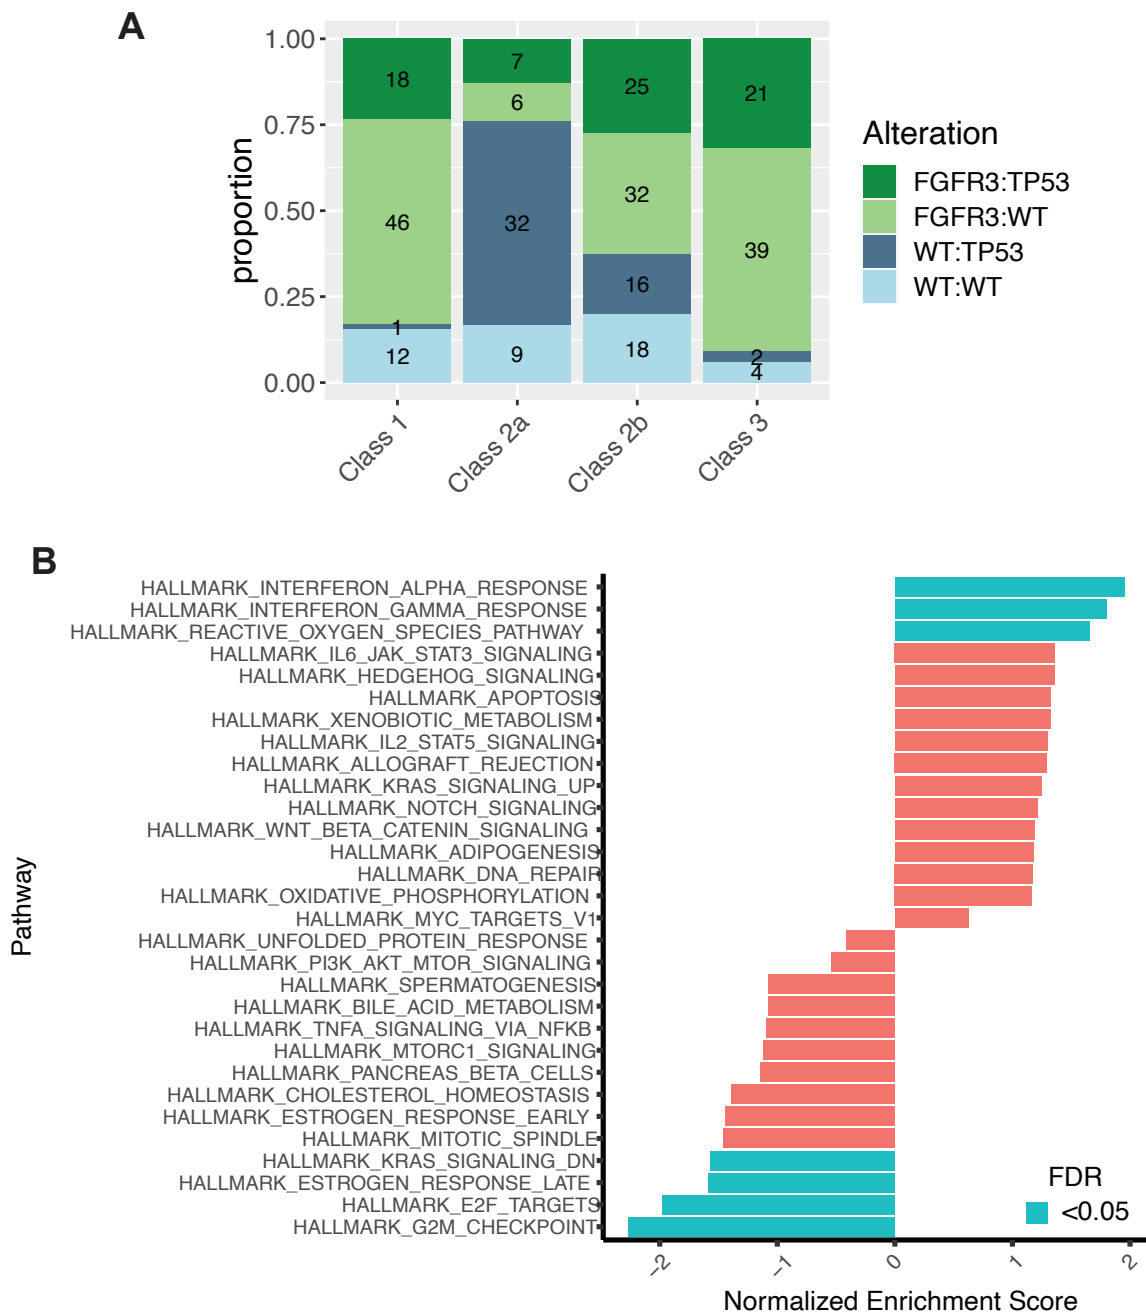

### Genomic and transcriptomic features of UPFL tumors - (A)

Co-occurrence rates of *FGFR3* DNA calling based mutations and RNA based *TP53* Pathway alterations for the UROMOL cohort. (B) Gene set enrichment analysis (GSEA) for the Hallmark expression signatures were performed on the log<sub>2</sub> - fold change between UPFL and UPPL tumors. The top ranking signatures by normalized enrichments score for UPFL and UPPL were plotted. Signature with an FDR < 0.05 are indicated by teal bars.

### Supplementary Figure 3

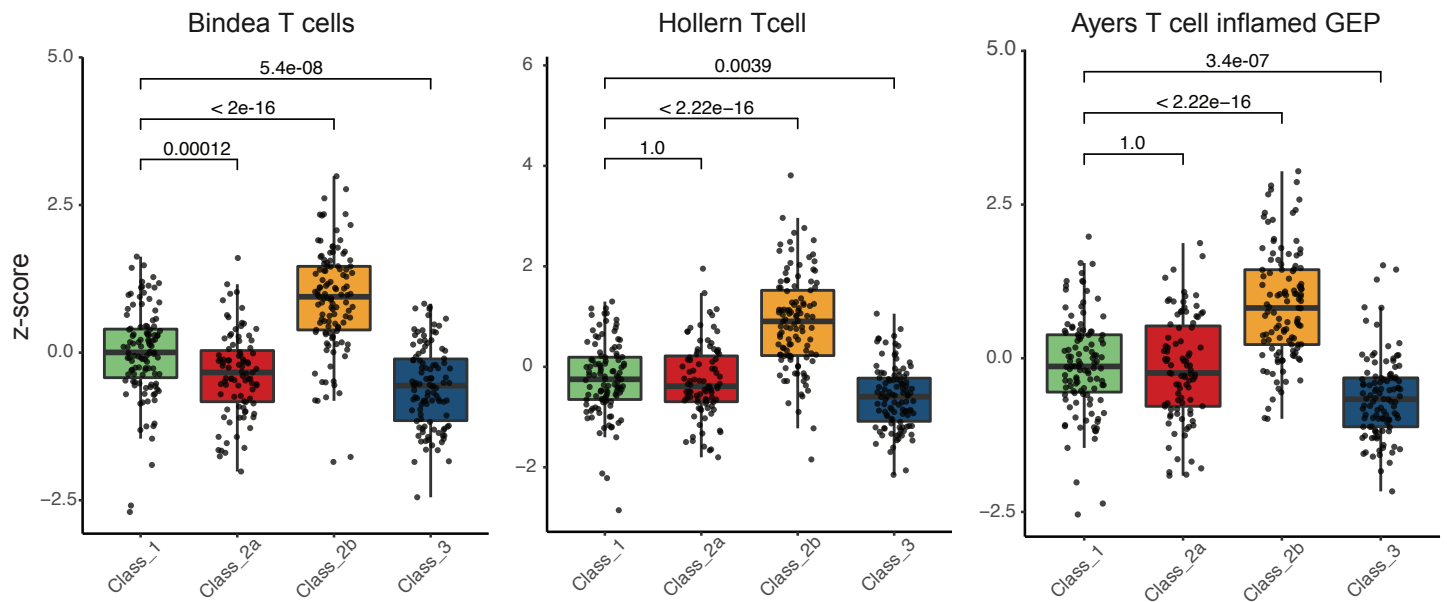

#### **T cell signature immune gene signatures scores.**

Signatures representing T cells were calculated for the UROMOL cohort and plotted by NMIBC class. All boxplots are represented by the IQR and midline at the median. Error bars represent  $Q1/Q3 \pm 1.5 \cdot IQR$ .

Two-sided t-tests followed by Bonferroni correction, to account for multiple comparisons, were performed with the p-values shown above the given comparison.

## Supplementary Figure 4

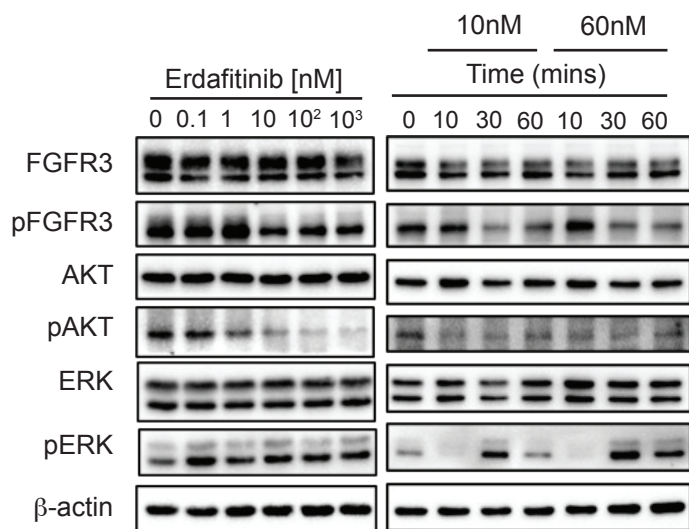

**UPFL derived cell line (UPFL3) is sensitive to FGFR inhibition** - Immunoblots with the indicated antibodies in whole cell extracts of UPFL3 cells treated with erdafitinib for the indicated dose and time.

# Supplementary Figure 5

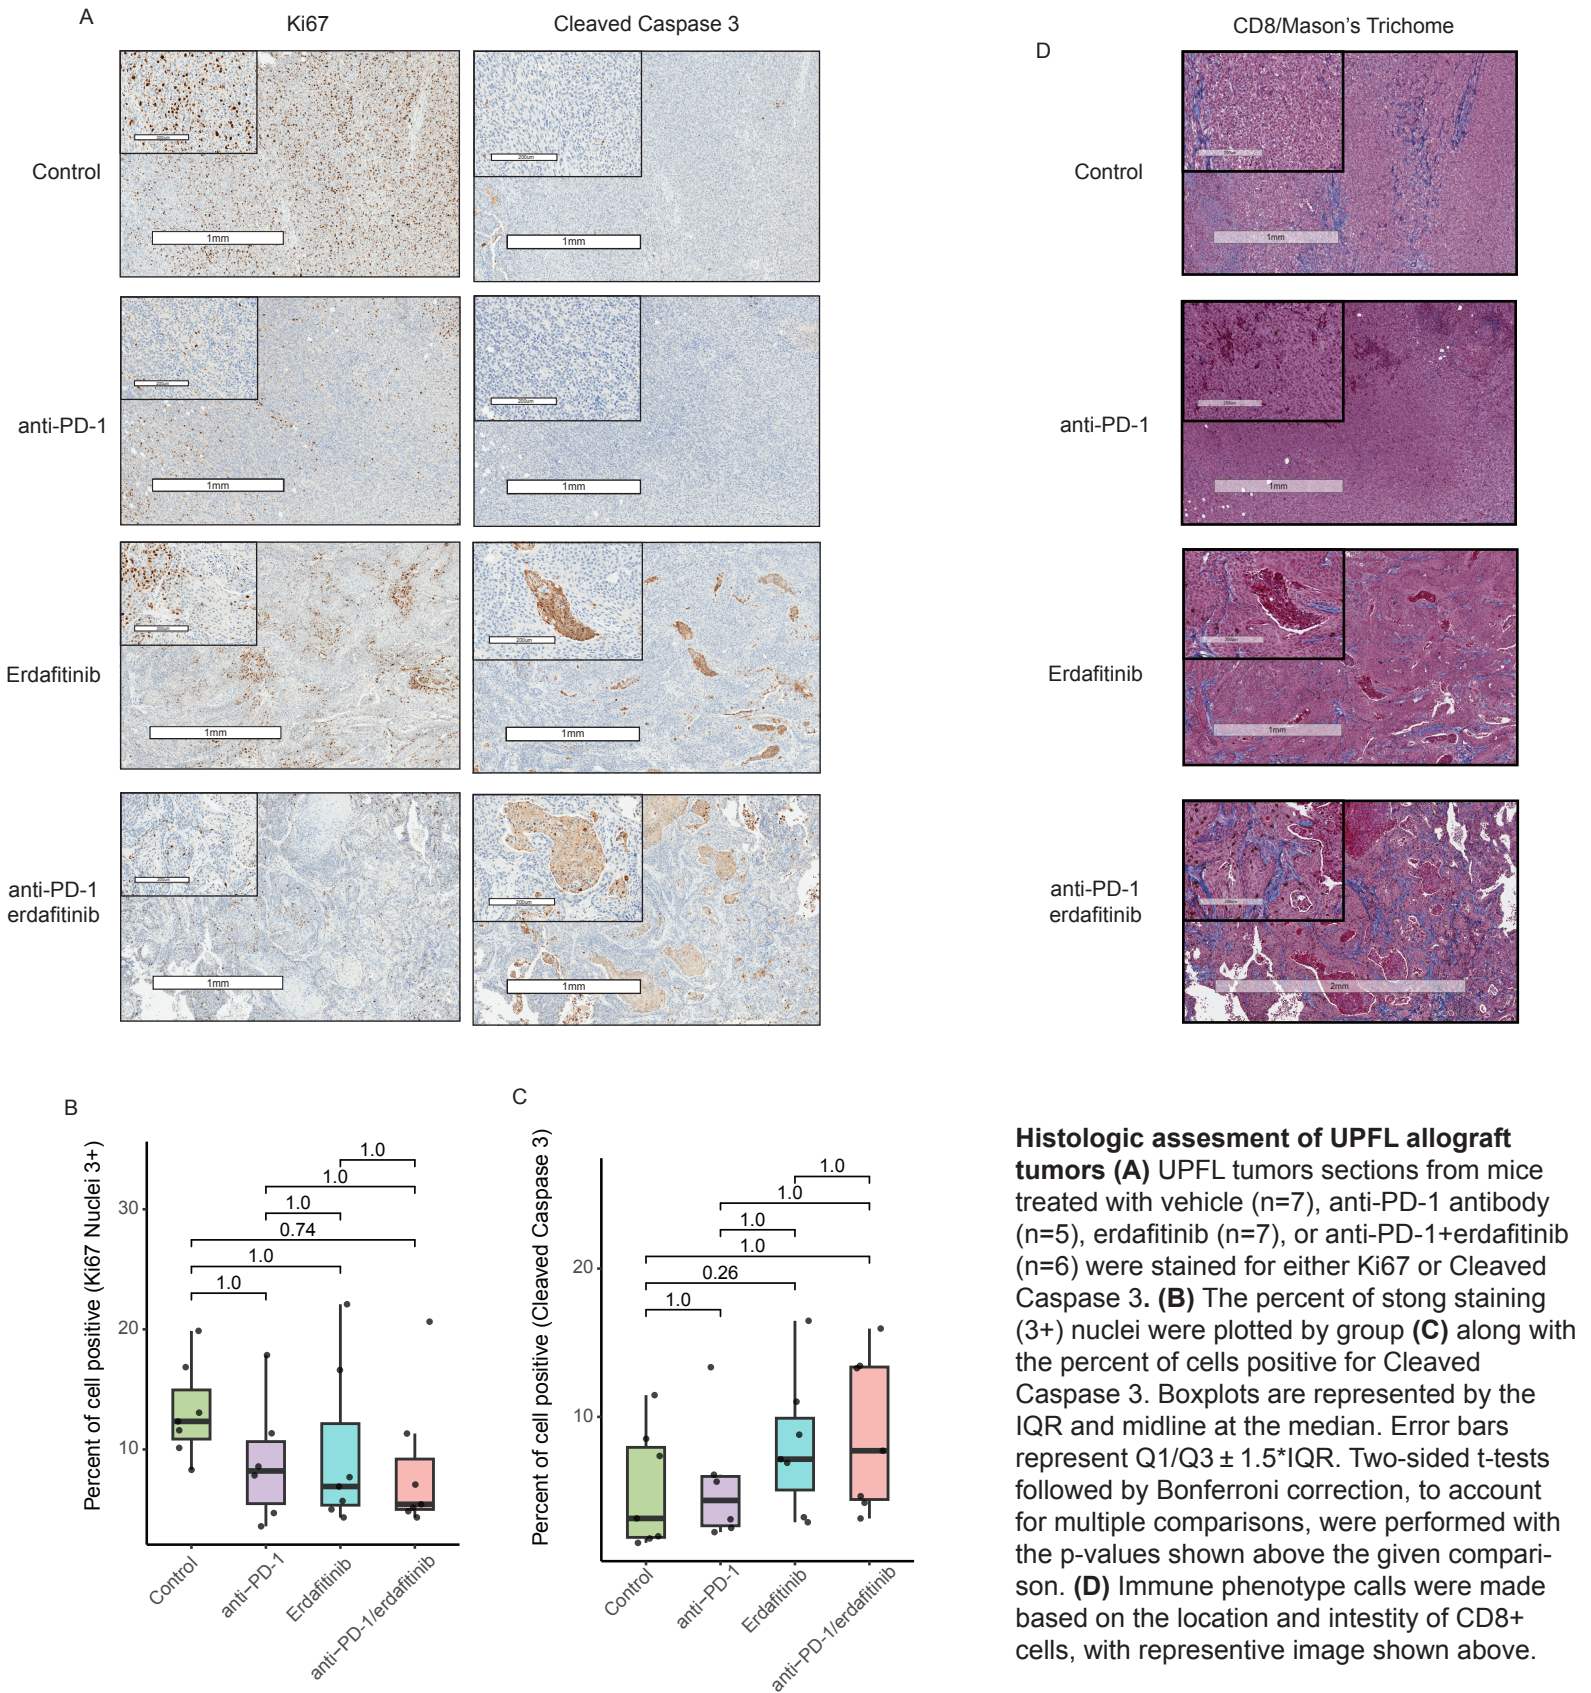

# Supplementary Figure 6

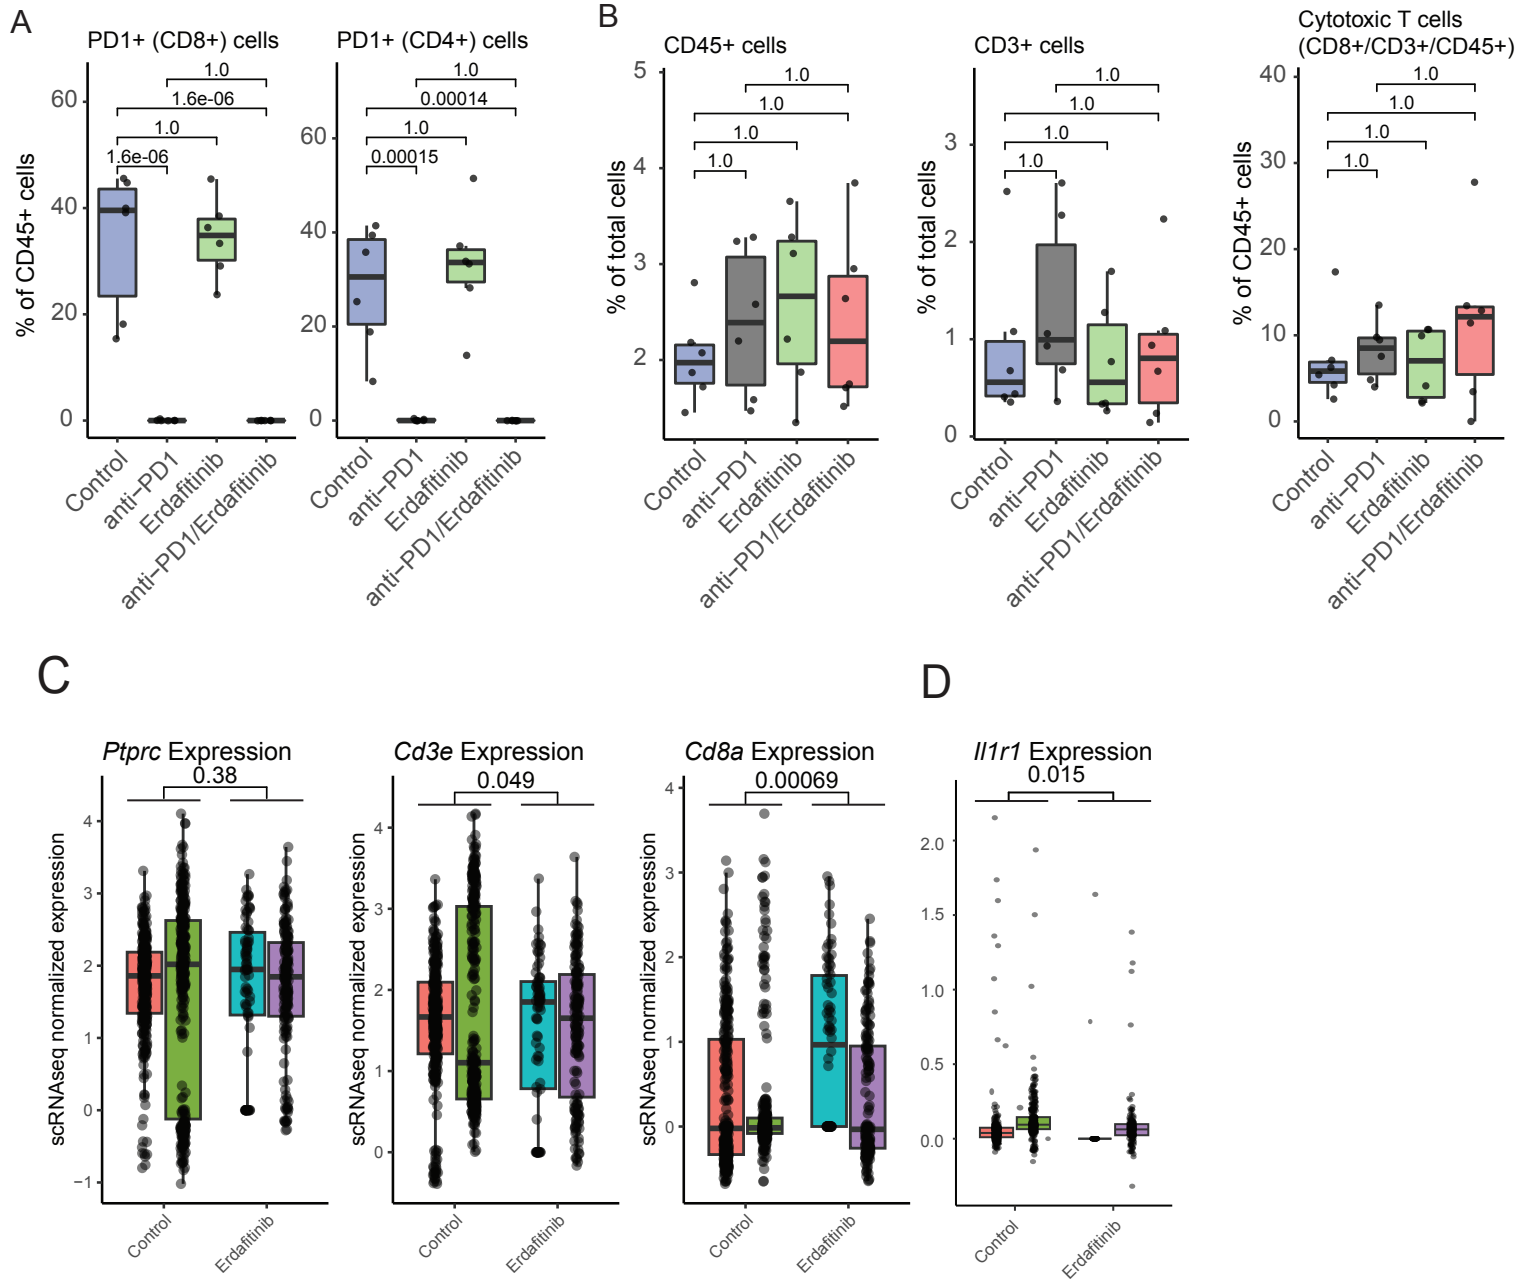

**Supplementary Figure 6 (A)** Box plots of percentage of CD45+ cells that are PD1+ in CD8+ (left) and CD4+ (right) for the indicated treatment group as well as **(B)** CD45+, CD3+, and CD8+ cytotoxic T cells after 1 week of treatment. **(C)** The T cell subset of cells identified by SingleR from control or erdaftitinib treated tumor were plotted by the scRNA expression values for *Ptprc* (CD45), *Cd3e* (CD3), and *Cd8a* (CD8) **(D)** *Il1r1*. All boxplots are represented by the IQR and midline at the median. Error bars represent Q1/Q3  $\pm$  1.5\*IQR. Two-sided t-tests followed by Bonferroni correction, to account for multiple comparisons, were performed with the p-values shown above the given comparison.

## Supplementary Figure 7

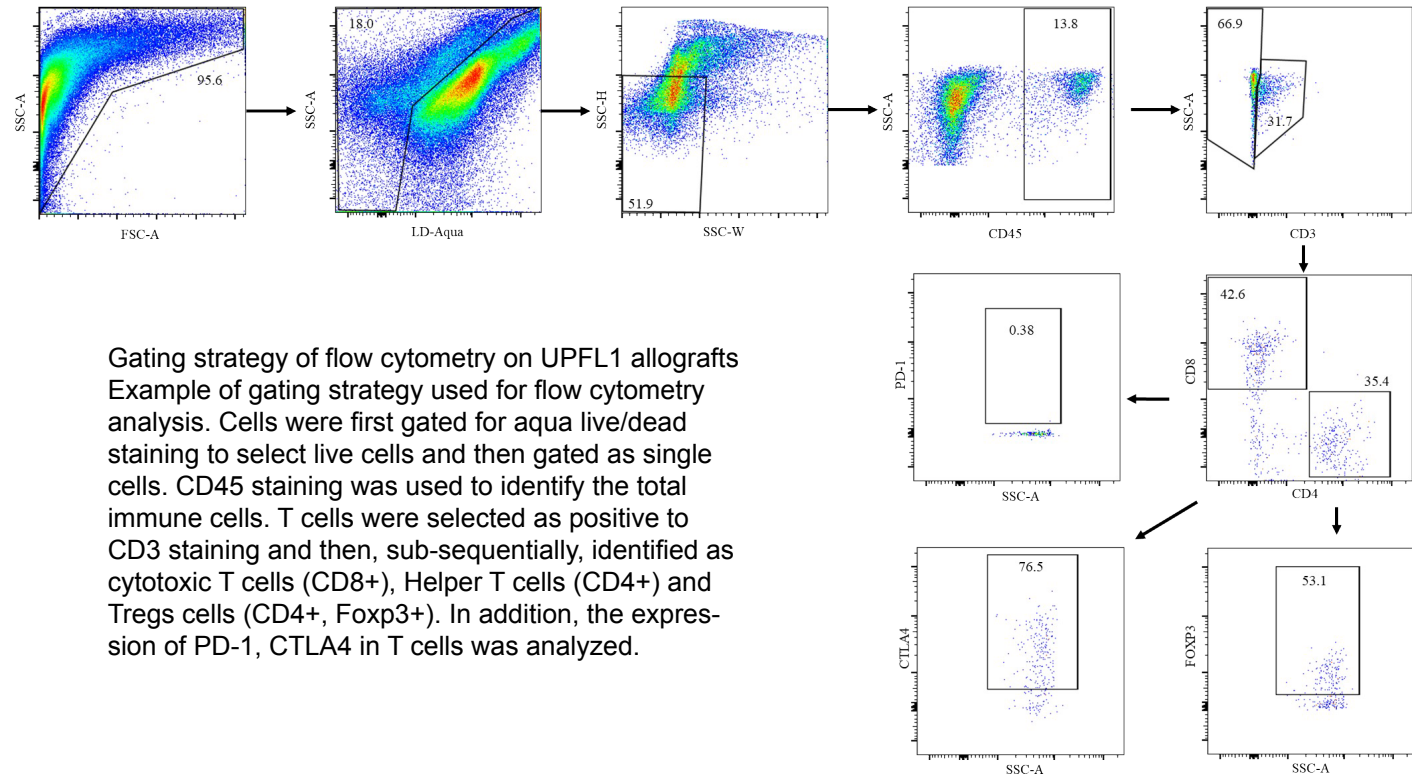

## Supplementary Figure 8

**A**

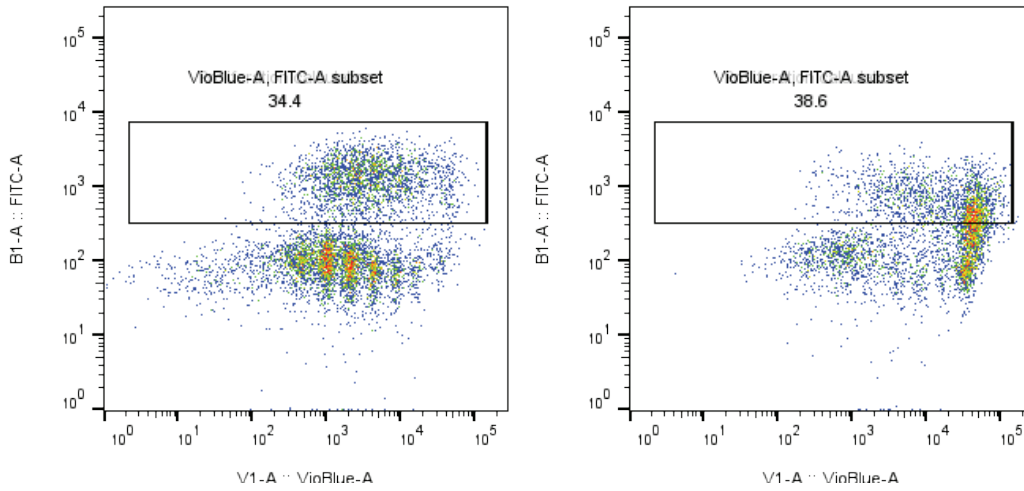

**B**

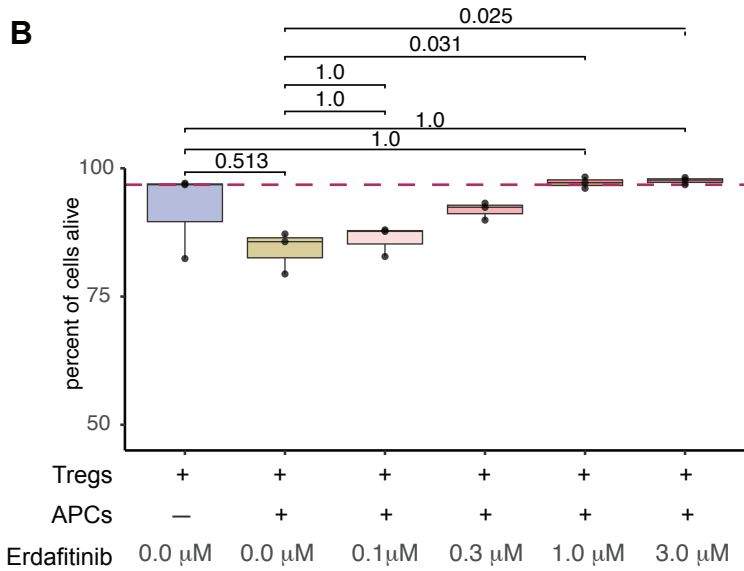

### Gating strategy and quantification for the isolation for Treg proliferation assay.

**(A)** FACS analysis was performed on the CD4<sup>+</sup>/Foxp3-GFP<sup>+</sup> population. Cells positive for crystal violet tracer (CVT) were identified as the non-proliferative population, whereas CVT<sup>+</sup> cells were considered proliferative. **(B)** Boxplot of the percent living cell Tregs following the 3 day proliferation assay, regardless of CVT status. **(C)** RNA expression of FGFR1, FGFR2, FGFR3 in T cell subsets. All boxplots are represented by the IQR and midline at the median. Error bars represent Q1/Q3 ± 1.5\*IQR. Two-sided t-tests followed by Bonferroni correction, to account for multiple comparisons, were performed with the p-values shown above the given comparison.

**C**

FGFR family expression by immune cell type (Schmiedel et. al.)

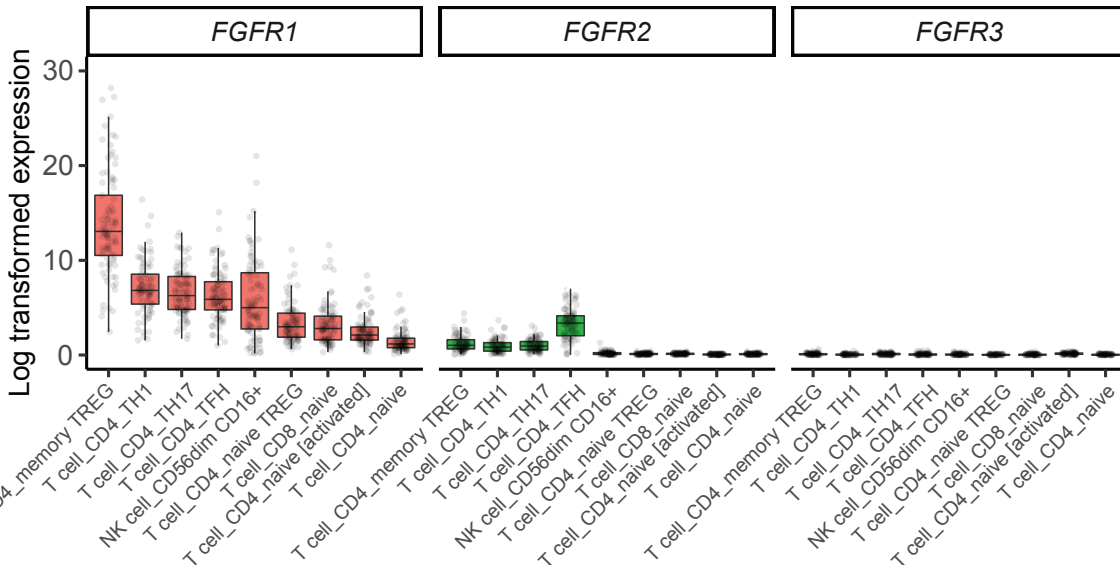

Supplement: jci-134-169241-s095.pdf [file jci-134-169241-s095.pdf]
