# Supplementary material for: FGFR inhibition augments anti–PD-1 efficacy in murine FGFR3-mutant bladder cancer by abrogating immunosuppression
Source: PubMed Central journal article supplement (PMC10786699; doi:10.1172/jci169241), 2024-01-16

## Unedited western blots

Prior to immunoblotting, the membrane was cut at specific molecular weights to allow for concurrent antibody incubation from the same gel.

Phosphorylated-antibodies were probed first then stripped and subsequently re-probed for the total protein.

Figure 5d (UPFL1)

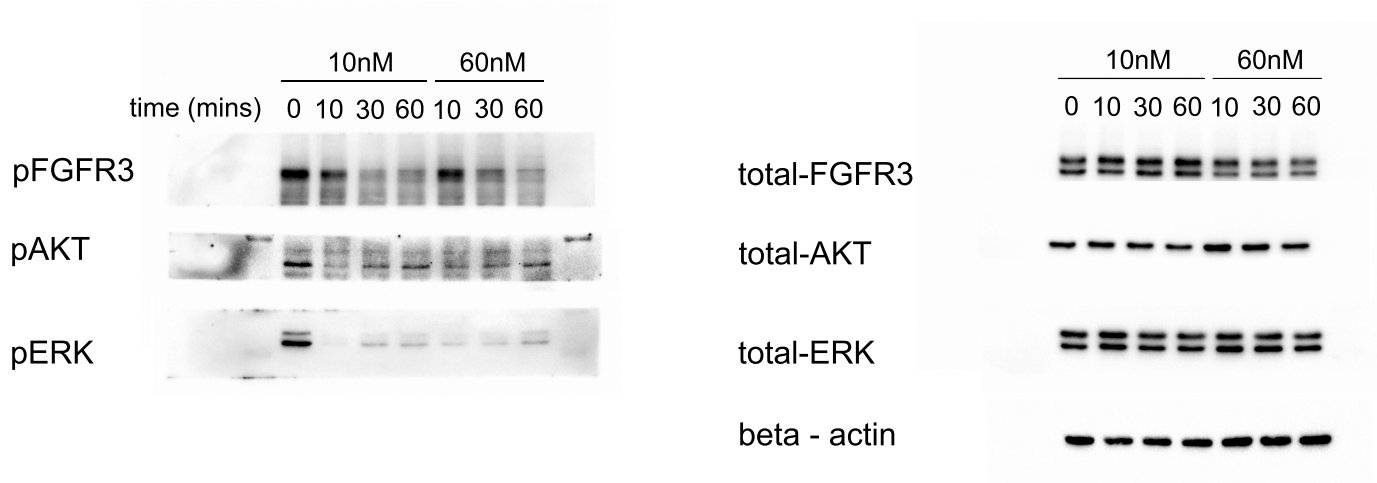

Supplementary Figure 4 (UPFL3) [Right]

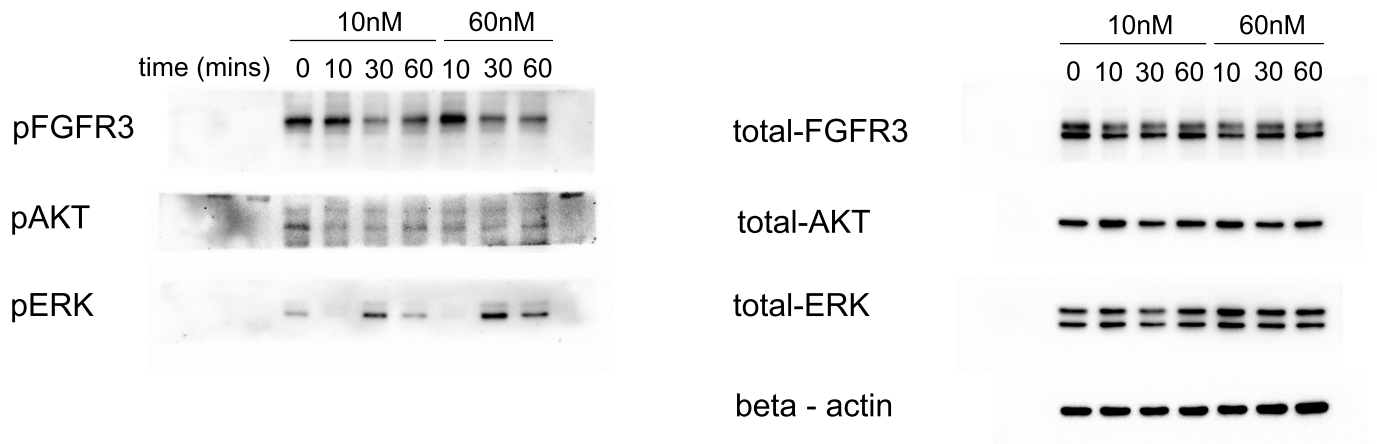

Supplementary Figure 4 (UPFL3) [Left]

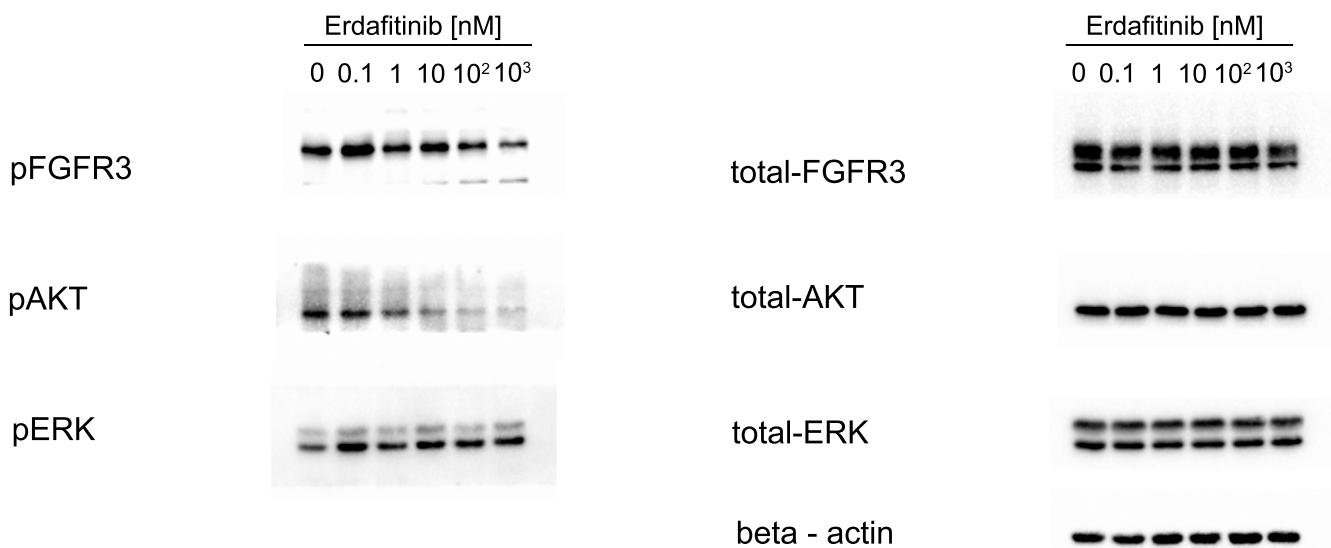

Supplement: jci-134-169241-s096.pdf [file jci-134-169241-s096.pdf]
